# Supplementary material for: A Citrus Fruit Extract High in Polyphenols Beneficially Modulates the Gut Microbiota of Healthy Human Volunteers in a Validated In Vitro Model of the Colon
Source: MDPI journal article supplement (doi:10.3390/nu13113915), 2021-11-01
Supplement: s1 [file s1]

## Supplementary figures and tables

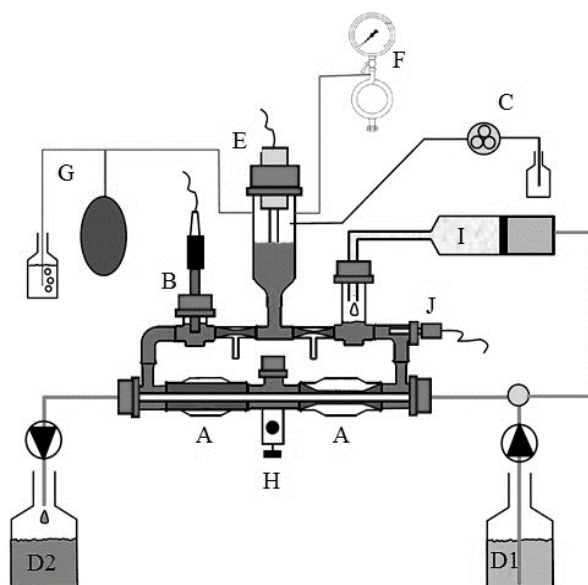

**Figure S1.** Schematic representation of one TIM-2 unit. (A) peristaltic compartments with a dialysis membrane inside, (B) pH sensor, (C) NaOH secretion, (D) dialysate system (D1=dialysate in, D2=dialysate out), (E) level sensor, (F), gaseous N<sub>2</sub> inlet, (G) gas outlet, (H) sampling port, (I) feeding syringe with test compound, (J) temperature sensor.

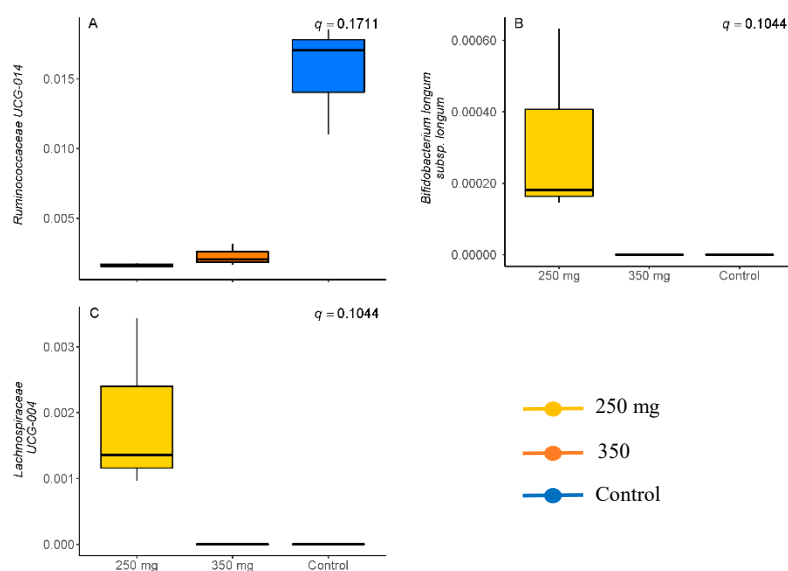

**Figure S2.** Relative abundance of (A) *Ruminococcaceae* UCG-014, (B) *Bifidobacterium longum* subsp. *longum*, (C) *Lachnospiraceae* UCG-004, after supplementation with Control (SIEM; blue) or 250 mg (yellow) or 350 mg (orange) of citrus fruit extract.

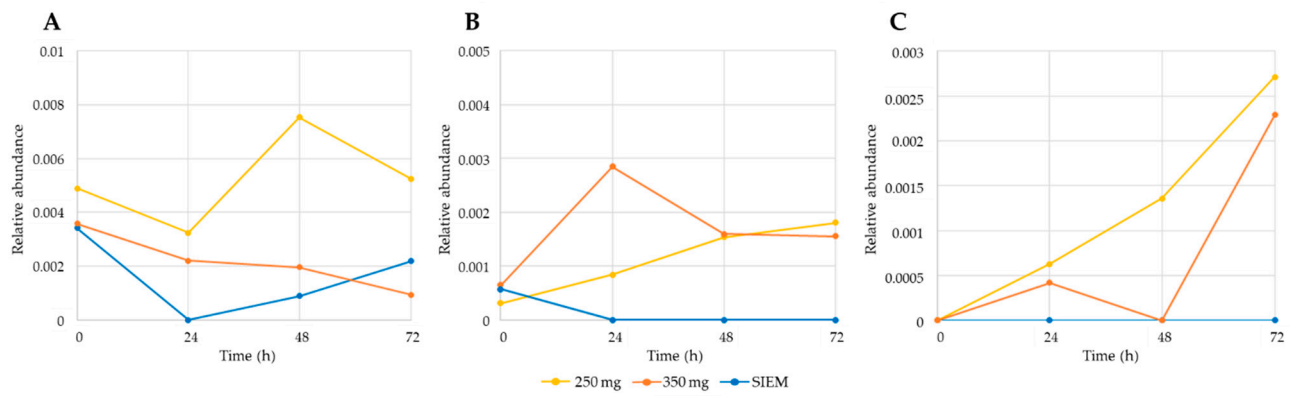

**Figure S3.** Changes in the relative abundance over time of (A) *Bacteroidales* S24-7 group, (B) *E. ramulus*, and (C) *L. mucosae* for the interventions with 250 mg (yellow) and 350 mg (orange) CFE and the control (blue).

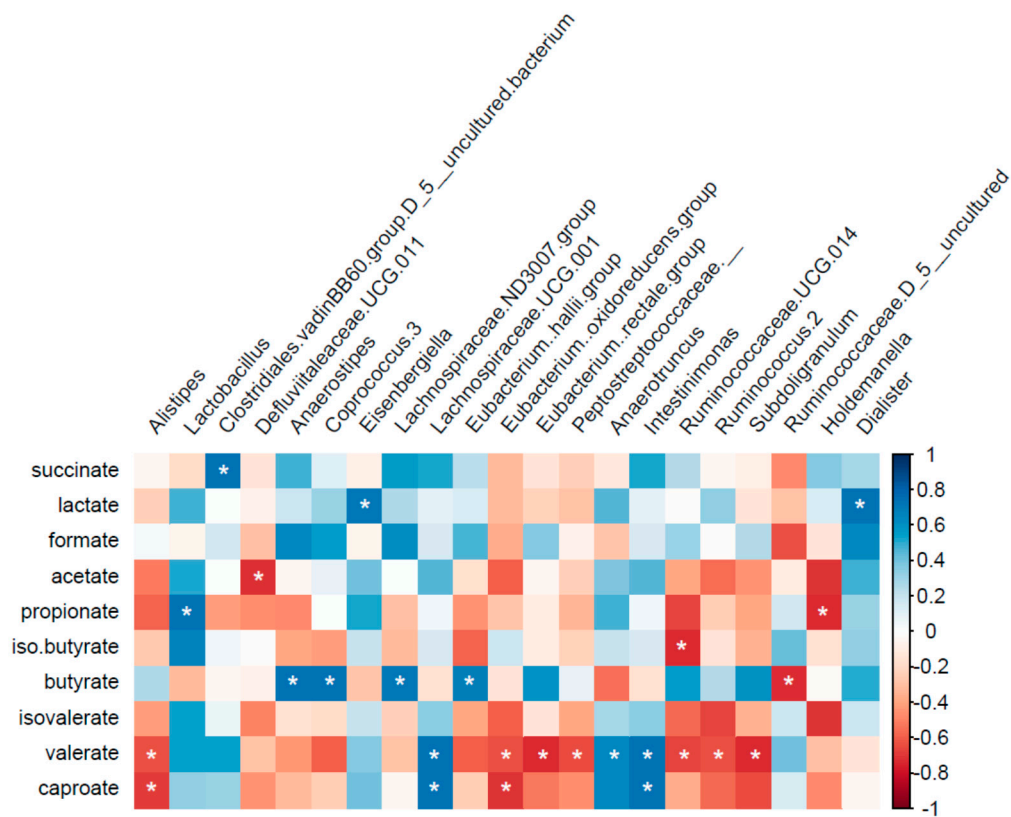

**Figure S4.** Correlation between metabolite production and specific OTUs at genus level for rho values  $< 0.75$  or  $> 0.75$ . \* $q \leq 0.2$ ; blue: positive correlation; red: negative correlation.

**Table S1.** Legend to Figure 1E. Values are relative abundance of the taxa. Top 25 taxa are colored according to Figure 1E.

|                                                                                           | 250 mg   | 350 mg   | SIEM     |
|-------------------------------------------------------------------------------------------|----------|----------|----------|
| Bacteroidetes; Bacteroidia; Bacteroidales; Bacteroidaceae; Bacteroides                    | 0.411047 | 0.403427 | 0.351763 |
| Firmicutes; Clostridia; Clostridiales; Ruminococcaceae; Ruminococcus 2                    | 0.094791 | 0.147031 | 0.107315 |
| Bacteroidetes; Bacteroidia; Bacteroidales; Rikenellaceae; Alistipes                       | 0.066985 | 0.041922 | 0.074895 |
| Firmicutes; Clostridia; Clostridiales; Lachnospiraceae; Roseburia                         | 0.043281 | 0.036543 | 0.008694 |
| Firmicutes; Clostridia; Clostridiales; Lachnospiraceae; ___                               | 0.023377 | 0.042614 | 0.014196 |
| Firmicutes; Clostridia; Clostridiales; Lachnospiraceae; Blautia                           | 0.023251 | 0.019607 | 0.035694 |
| Bacteroidetes; Bacteroidia; Bacteroidales; Prevotellaceae; uncultured                     | 0.019753 | 0.020737 | 0.030783 |
| Firmicutes; Clostridia; Clostridiales; Ruminococcaceae; Faecalibacterium                  | 0.025793 | 0.021594 | 0.023475 |
| Bacteroidetes; Bacteroidia; Bacteroidales; Prevotellaceae; Prevotella 7                   | 0.017162 | 0.015441 | 0.032341 |
| Firmicutes; Clostridia; Clostridiales; Lachnospiraceae; Dorea                             | 0.017715 | 0.013491 | 0.027509 |
| Firmicutes; Clostridia; Clostridiales; Lachnospiraceae; [Eubacterium] hallii group        | 0.005662 | 0.008395 | 0.039293 |
| Firmicutes; Clostridia; Clostridiales; Lachnospiraceae; Lachnospiraceae NK4A136 group     | 0.016759 | 0.018185 | 0.017158 |
| Firmicutes; Clostridia; Clostridiales; Ruminococcaceae; Ruminococcaceae UCG-014           | 0.015778 | 0.00989  | 0.02483  |
| Firmicutes; Clostridia; Clostridiales; Ruminococcaceae; Ruminococcaceae UCG-002           | 0.020332 | 0.016326 | 0.012745 |
| Firmicutes; Clostridia; Clostridiales; Ruminococcaceae; ___                               | 0.008782 | 0.010218 | 0.021992 |
| Firmicutes; Clostridia; Clostridiales; Christensenellaceae; Christensenellaceae R-7 group | 0.013563 | 0.011066 | 0.016063 |
| Proteobacteria; Betaproteobacteria; Burkholderiales; Alcaligenaceae; Sutterella           | 0.008883 | 0.007137 | 0.020505 |
| Firmicutes; Clostridia; Clostridiales; Lachnospiraceae; [Eubacterium] eligens group       | 0.016407 | 0.01463  | 0.004819 |
| Firmicutes; Negativicutes; Selenomonadales; Acidaminococcaceae; Phascolarctobacterium     | 0.017212 | 0.012916 | 0.005021 |
| Firmicutes; Clostridia; Clostridiales; Ruminococcaceae; Ruminococcaceae UCG-003           | 0.009864 | 0.009207 | 0.013846 |
| Bacteroidetes; Bacteroidia; Bacteroidales; Porphyromonadaceae; Parabacteroides            | 0.008455 | 0.007402 | 0.012453 |
| Bacteroidetes; Bacteroidia; Bacteroidales; Porphyromonadaceae; Barnesiella                | 0.007297 | 0.005342 | 0.014787 |
| Firmicutes; Clostridia; Clostridiales; Ruminococcaceae; Ruminococcaceae UCG-005           | 0.007927 | 0.006162 | 0.003887 |
| Firmicutes; Clostridia; Clostridiales; Lachnospiraceae; Butyrivibrio                      | 0.007474 | 0.006782 | 0.00236  |
| Firmicutes; Clostridia; Clostridiales; Lachnospiraceae; Coprococcus 3                     | 0.005586 | 0.005305 | 0.002813 |
| Firmicutes; Negativicutes; Selenomonadales; Veillonellaceae; Dialister                    | 0.00463  | 0.003245 | 0.005178 |
| Proteobacteria; Betaproteobacteria; Burkholderiales; Alcaligenaceae; Parasutterella       | 0.004781 | 0.003464 | 0.00437  |
| Firmicutes; Clostridia; Clostridiales; Ruminococcaceae; uncultured                        | 0.004152 | 0.005898 | 0.002009 |
| Firmicutes; Clostridia; Clostridiales; Ruminococcaceae; Ruminococcaceae NK4A214 group     | 0.004278 | 0.00319  | 0.003971 |

|                                                                                            |          |          |          |
|--------------------------------------------------------------------------------------------|----------|----------|----------|
| Firmicutes; Clostridia; Clostridiales; Lachnospiraceae; Lachnospiraceae UCG-004            | 0.004278 | 0.004649 | 0.002394 |
| Bacteroidetes; Bacteroidia; Bacteroidales; Bacteroidales S24-7 group; uncultured bacterium | 0.004982 | 0.003509 | 0.001752 |
| Firmicutes; Clostridia; Clostridiales; Ruminococcaceae; Subdoligranulum                    | 0.004001 | 0.004111 | 0.001916 |
| Proteobacteria; Gammaproteobacteria; Enterobacteriales; Enterobacteriaceae; __             | 0.002743 | 0.004567 | 0.001991 |
| Firmicutes; Clostridia; Clostridiales; Lachnospiraceae; Lachnoclostridium                  | 0.002567 | 0.002552 | 0.003198 |
| Firmicutes; Clostridia; Clostridiales; Lachnospiraceae; [Eubacterium] rectale group        | 0.002516 | 0.003874 | 0.00192  |
| Firmicutes; Clostridia; Clostridiales; Lachnospiraceae; Lachnospiraceae ND3007 group       | 0.00161  | 0.002124 | 0.004095 |
| Actinobacteria; Actinobacteria; Bifidobacteriales; Bifidobacteriaceae; Bifidobacterium     | 0.001585 | 0.002106 | 0.003482 |
| Bacteroidetes; Bacteroidia; Bacteroidales; Porphyromonadaceae; Odoribacter                 | 0.001711 | 0.001057 | 0.003638 |
| Bacteroidetes; Bacteroidia; Bacteroidales; Rikenellaceae; Rikenellaceae RC9 gut group      | 0.001258 | 0.001094 | 0.00321  |
| Verrucomicrobia; Verrucomicrobiae; Verrucomicrobiales; Verrucomicrobiaceae; Akkermansia    | 0.002567 | 0.001777 | 0.000951 |
| Firmicutes; Clostridia; Clostridiales; Peptostreptococcaceae; __                           | 0.001158 | 0.001522 | 0.002468 |
| Firmicutes; Clostridia; Clostridiales; Defluviitaleaceae; Defluviitaleaceae UCG-011        | 0.002693 | 0.001395 | 0.000924 |
| Actinobacteria; Coriobacteriia; Coriobacteriales; Coriobacteriaceae; Collinsella           | 0.001661 | 0.002425 | 0.000752 |
| Bacteroidetes; Bacteroidia; Bacteroidales; __; __                                          | 0.001837 | 0.001194 | 0.001645 |
| Tenericutes; Mollicutes; Anaeroplasmatales; Anaeroplasmataceae; Anaeroplasmata             | 0.001535 | 0.001942 | 0.000862 |
| Firmicutes; Clostridia; Clostridiales; Clostridiaceae 1; Clostridium sensu stricto 1       | 0.001535 | 0.00165  | 0.000762 |
| Firmicutes; Clostridia; Clostridiales; Lachnospiraceae; Lachnospira                        | 0.00161  | 0.001167 | 0.000828 |
| Firmicutes; Clostridia; Clostridiales; Lachnospiraceae; [Ruminococcus] torques group       | 0.00156  | 0.001276 | 0.000618 |
| Firmicutes; Clostridia; Clostridiales; Clostridiales vadinBB60 group; uncultured bacterium | 0.001007 | 0.001149 | 0.001189 |
| Firmicutes; Erysipelotrichia; Erysipelotrichales; Erysipelotrichaceae; Turicibacter        | 0        | 0.000902 | 0.002152 |
| Proteobacteria; Alphaproteobacteria; Rhodospirillales; Rhodospirillaceae; uncultured       | 0.001082 | 0.001121 | 0.000841 |
| Firmicutes; Clostridia; Clostridiales; Lachnospiraceae; uncultured                         | 0.001258 | 0.000966 | 0.000697 |
| Firmicutes; Clostridia; Clostridiales; Ruminococcaceae; Ruminiclostridium 9                | 0.000403 | 0.000866 | 0.001609 |
| Firmicutes; Clostridia; Clostridiales; Ruminococcaceae; Ruminiclostridium 6                | 0.001661 | 0.000829 | 0.00033  |
| Firmicutes; Clostridia; Clostridiales; Ruminococcaceae; Ruminococcus 1                     | 0.001309 | 0.000829 | 0.00068  |
| Firmicutes; Clostridia; Clostridiales; Lachnospiraceae; [Eubacterium] xylanophilum group   | 0        | 0.001258 | 0.001549 |
| Firmicutes; Clostridia; Clostridiales; Lachnospiraceae; Coprococcus 2                      | 0.001636 | 0.000829 | 0.000309 |
| Firmicutes; Clostridia; Clostridiales; Lachnospiraceae; [Ruminococcus] gauvreauii group    | 0        | 0.001121 | 0.00165  |
| Firmicutes; Erysipelotrichia; Erysipelotrichales; Erysipelotrichaceae; Holdemanella        | 0.001183 | 0.001094 | 0.000405 |
| Firmicutes; Clostridia; Clostridiales; Lachnospiraceae; Coprococcus 1                      | 0.001107 | 0.001057 | 0.000477 |

|                                                                                                    |          |          |          |
|----------------------------------------------------------------------------------------------------|----------|----------|----------|
| Firmicutes; Clostridia; Clostridiales; Ruminococcaceae; [Eubacterium] coprostanoligenes group      | 0.001535 | 0.000729 | 0.000357 |
| Bacteroidetes; Bacteroidia; Bacteroidales; Porphyromonadaceae; uncultured                          | 0.001183 | 0.000784 | 0.000292 |
| Firmicutes; Clostridia; Clostridiales; Ruminococcaceae; Ruminococcaceae UCG-013                    | 0.000403 | 0.000848 | 0.000976 |
| Firmicutes; Clostridia; Clostridiales; Lachnospiraceae; Anaerostipes                               | 0.00083  | 0.000738 | 0.000622 |
| Firmicutes; Clostridia; Clostridiales; Ruminococcaceae; Oscillospira                               | 0.00083  | 0.000912 | 0.000412 |
| Firmicutes; Clostridia; Clostridiales; Ruminococcaceae; Ruminococcaceae UCG-010                    | 0.000579 | 0.000492 | 0.000913 |
| Tenericutes; Mollicutes; Mollicutes RF9; uncultured bacterium; uncultured bacterium                | 0        | 0.000465 | 0.001477 |
| Firmicutes; Clostridia; Clostridiales; Lachnospiraceae; Fusicatenibacter                           | 0.000654 | 0.000702 | 0.00055  |
| Firmicutes; Clostridia; Clostridiales; Clostridiales vadinBB60 group; gut metagenome               | 0.000377 | 0.000492 | 0.00099  |
| Bacteroidetes; Bacteroidia; Bacteroidales; Porphyromonadaceae; Butyricimonas                       | 0.000654 | 0.000447 | 0.00035  |
| Firmicutes; Clostridia; Clostridiales; Lachnospiraceae; Marvinbryantia                             | 0.000503 | 0.000647 | 0.00024  |
| Firmicutes; Clostridia; Clostridiales; Lachnospiraceae; Lachnospiraceae UCG-010                    | 0.000302 | 0.000255 | 0.000824 |
| Proteobacteria; Gammaproteobacteria; Enterobacteriales; Enterobacteriaceae; Proteus                | 0        | 0        | 0.00136  |
| Proteobacteria; Alphaproteobacteria; Rhodospirillales; Acetobacteraceae; Gluconobacter             | 0.000604 | 0.000383 | 0.000357 |
| Firmicutes; Erysipelotrichia; Erysipelotrichales; Erysipelotrichaceae; uncultured                  | 0.000352 | 0.000583 | 0.000333 |
| Bacteroidetes; Bacteroidia; Bacteroidales; Porphyromonadaceae; Coprobacter                         | 0.000528 | 0.000492 | 0.000213 |
| Firmicutes; Clostridia; Clostridiales; Ruminococcaceae; Oscillibacter                              | 0.000705 | 0.000219 | 0.000295 |
| Tenericutes; Mollicutes; NB1-n; Ambiguous_taxa; Ambiguous_taxa                                     | 0.000302 | 0        | 0.000836 |
| Firmicutes; Clostridia; Clostridiales; Ruminococcaceae; Flavonifractor                             | 0.000403 | 0.000419 | 0.000278 |
| Actinobacteria; Coriobacteriia; Coriobacteriales; Coriobacteriaceae; uncultured                    | 0.000528 | 0.000264 | 0.000137 |
| Firmicutes; Erysipelotrichia; Erysipelotrichales; Erysipelotrichaceae; Erysipelotrichaceae UCG-003 | 0.000377 | 0.000319 | 0.000213 |
| Firmicutes; Clostridia; Clostridiales; Ruminococcaceae; Butyricicoccus                             | 7.55E-05 | 0.000583 | 0.000227 |
| Proteobacteria; Gammaproteobacteria; Enterobacteriales; Enterobacteriaceae; Escherichia-Shigella   | 0.000403 | 0.000264 | 0.00021  |
| Firmicutes; Clostridia; Clostridiales; Peptostreptococcaceae; Intestinibacter                      | 0.000503 | 0.000228 | 0.000131 |
| Proteobacteria; Gammaproteobacteria; Enterobacteriales; Enterobacteriaceae; Citrobacter            | 0        | 0.000848 | 0        |
| Firmicutes; Clostridia; Clostridiales; Lachnospiraceae; Ambiguous_taxa                             | 0        | 0.000811 | 0        |
| Firmicutes; Bacilli; Lactobacillales; Enterococcaceae; Enterococcus                                | 0.000478 | 0.000328 | 0        |
| Bacteroidetes; Bacteroidia; Bacteroidales; Prevotellaceae; Prevotella 9                            | 0.000277 | 0.000365 | 0.000124 |
| Firmicutes; Clostridia; Clostridiales; Ruminococcaceae; Ruminiclostridium 5                        | 0.000252 | 0.00031  | 0.000124 |
| Firmicutes; Erysipelotrichia; Erysipelotrichales; Erysipelotrichaceae; Erysipelotrichaceae UCG-004 | 0.000277 | 0.000246 | 0.000089 |
| Firmicutes; Clostridia; Clostridiales; Lachnospiraceae; Lachnospiraceae FCS020 group               | 0        | 0.000456 | 0.000151 |

|                                                                                                                   |          |          |          |
|-------------------------------------------------------------------------------------------------------------------|----------|----------|----------|
| Firmicutes; Clostridia; Clostridiales; Lachnospiraceae; Lachnospiraceae NC2004 group                              | 0        | 0        | 0.000521 |
| Firmicutes; Clostridia; Clostridiales; Lachnospiraceae; [Eubacterium] oxidoreducens group                         | 0        | 0        | 0.000521 |
| Firmicutes; Clostridia; Clostridiales; Clostridiales vadinBB60 group; uncultured organism                         | 0.000252 | 0.000164 | 0.000045 |
| Firmicutes; Clostridia; Clostridiales; Ruminococcaceae; Anaerotruncus                                             | 0.000176 | 0.000173 | 0.00011  |
| Tenericutes; Mollicutes; Mollicutes RF9; __; __                                                                   | 0        | 0.00021  | 0.000179 |
| Proteobacteria; Gammaproteobacteria; Pseudomonadales; Moraxellaceae; Enhydrobacter                                | 0.000176 | 0.000082 | 0.000079 |
| Firmicutes; Clostridia; Clostridiales; Lachnospiraceae; [Eubacterium] ventriosum group                            | 0        | 0.000182 | 0.000076 |
| Lentisphaerae; Lentisphaeria; Victivallales; vadinBE97; uncultured bacterium                                      | 0.000050 | 0.000173 | 0.000027 |
| Archaea; Euryarchaeota; Methanobacteria; Methanobacteriales; Methanobacteriaceae; Methanobrevibacter              | 0        | 0.000182 | 0.000048 |
| Firmicutes; Clostridia; Clostridiales; Family XIII; Family XIII UCG-001                                           | 0        | 0.000118 | 0.000096 |
| Firmicutes; Bacilli; Lactobacillales; Streptococcaceae; Streptococcus                                             | 0        | 0.000155 | 0.000055 |
| Firmicutes; Clostridia; Clostridiales; Lachnospiraceae; Eisenbergiella                                            | 0        | 0.0001   | 0.000106 |
| Proteobacteria; Deltaproteobacteria; Desulfovibrionales; Desulfovibrionaceae; Bilophila                           | 0        | 0.0001   | 0.000096 |
| Firmicutes; Clostridia; Clostridiales; Peptococcaceae; Peptococcus                                                | 0        | 0.000109 | 0.000079 |
| Proteobacteria; Deltaproteobacteria; Desulfovibrionales; Desulfovibrionaceae; Desulfovibrio                       | 0.000126 | 0        | 0.000045 |
| Proteobacteria; Betaproteobacteria; Burkholderiales; Comamonadaceae; Comamonas                                    | 0        | 0.000118 | 0.000048 |
| Cyanobacteria; Melainabacteria; Gastranaerophilales; Clostridium sp. K4410.MGS-306; Clostridium sp. K4410.MGS-306 | 0        | 0.000118 | 0.000027 |
| Firmicutes; Bacilli; Bacillales; Bacillaceae; Bacillus                                                            | 0        | 0.000128 | 0        |
| Firmicutes; Clostridia; Clostridiales; Lachnospiraceae; Moryella                                                  | 0.000126 | 0        | 0        |
| Firmicutes; Clostridia; Clostridiales; Lachnospiraceae; Tyzzerella                                                | 0        | 0.000055 | 0.000052 |
| Proteobacteria; Gammaproteobacteria; Pasteurellales; Pasteurellaceae; Haemophilus                                 | 0.000101 | 0        | 0        |
| Firmicutes; Clostridia; Clostridiales; Family XIII; Family XIII AD3011 group                                      | 0        | 0        | 0.000072 |
| Firmicutes; Clostridia; Clostridiales; Lachnospiraceae; [Eubacterium] ruminantium group                           | 0        | 0        | 0.000072 |
| Bacteroidetes; Bacteroidia; Bacteroidales; Prevotellaceae; Paraprevotella                                         | 0        | 0        | 0.000065 |
| Firmicutes; Clostridia; Clostridiales; Lachnospiraceae; Lachnospiraceae UCG-008                                   | 0        | 0        | 0.000052 |
| Proteobacteria; Gammaproteobacteria; Pseudomonadales; Moraxellaceae; Acinetobacter                                | 0        | 0        | 0.000052 |
| Unassigned                                                                                                        | 0.000050 | 0        | 0        |
| Bacteroidetes; Bacteroidia; Bacteroidales; Bacteroidales S24-7 group; gut metagenome                              | 0        | 0        | 0.000038 |
| Firmicutes; Clostridia; Clostridiales; Ruminococcaceae; Intestinimonas                                            | 0        | 0        | 0.000038 |
| Firmicutes; Clostridia; Clostridiales; Clostridiales vadinBB60 group; Ambiguous_taxa                              | 0        | 0        | 0.000034 |
| Firmicutes; Clostridia; Clostridiales; Ruminococcaceae; Hydrogenoanaerobacterium                                  | 0        | 0        | 0.000031 |

|                                                                                                       |   |          |          |
|-------------------------------------------------------------------------------------------------------|---|----------|----------|
| Actinobacteria; Coriobacteriia; Coriobacteriales; Coriobacteriaceae; Adlercreutzia                    | 0 | 0        | 0.000027 |
| Actinobacteria; Coriobacteriia; Coriobacteriales; Coriobacteriaceae; Slackia                          | 0 | 0        | 0.000021 |
| Firmicutes; Clostridia; Clostridiales; Christensenellaceae; uncultured                                | 0 | 0        | 0.000021 |
| Firmicutes; Clostridia; Clostridiales; Ruminococcaceae; Caproiciproducens                             | 0 | 0        | 0.000021 |
| Bacteroidetes; Bacteroidia; Bacteroidales; Prevotellaceae; Prevotella                                 | 0 | 0.000018 | 0        |
| Bacteroidetes; Bacteroidia; Bacteroidales; uncultured; Ambiguous_taxa                                 | 0 | 0        | 0.000017 |
| Firmicutes; Bacilli; Bacillales; Planococcaceae; Kurthia                                              | 0 | 0        | 0.000017 |
| Firmicutes; Bacilli; Lactobacillales; Leuconostocaceae; Oenococcus                                    | 0 | 0        | 0.000017 |
| Firmicutes; Clostridia; Clostridiales; Lachnospiraceae; Howardella                                    | 0 | 0        | 0.000017 |
| Firmicutes; Clostridia; Clostridiales; Clostridiales vadinBB60 group; uncultured Clostridia bacterium | 0 | 0        | 0.000010 |
| Firmicutes; Erysipelotrichia; Erysipelotrichales; Erysipelotrichaceae; Catenisphaera                  | 0 | 0        | 0.000010 |
| Bacteria                                                                                              | 0 | 0        | 0.000010 |
| Bacteroidetes; Bacteroidia; Bacteroidales; Prevotellaceae; Alloprevotella                             | 0 | 0        | 0.000007 |

Taxa listed in order of high -> low relative abundance.
